# Supplementary material for: Energy-Based Unified Models for Predicting the Fatigue Life Behaviors of Austenitic Steels and Welded Joints in Ultra-Supercritical Power Plants
Source: MDPI journal article supplement (doi:10.3390/ma17102186), 2024-05-07
Supplement: s1 [file s1]

Supplementary Materials for

# **Energy-Based Unified Models for Predicting the Fatigue Life Behaviors of Austenitic Steels and Welded Joints in Ultra-Supercritical Power Plants**

**Jeong Ho Hwang <sup>1,†</sup>, Dae-Woong Kim <sup>2,3,4,†</sup>, Jae-Yong Lim <sup>4,\*</sup> and Seong-Gu Hong <sup>2,3,5,\*</sup>**

<sup>1</sup> Institute of Future Energy Technology, FNC Technology Co., Ltd., Yongin 17084, Republic of Korea; jhhwang@fnctech.com

<sup>2</sup> Convergence Research Center for Meta-Touch, Korea Research Institute of Standards and Science, Daejeon 34113, Republic of Korea; kimdw@kriss.re.kr

<sup>3</sup> Division of Chemical and Material Metrology, Korea Research Institute of Standards and Science, Daejeon 34113, Republic of Korea

<sup>4</sup> Department of Safety Engineering, Seoul National University of Science and Technology, Seoul 01811, Republic of Korea

<sup>5</sup> Department of Nano Science, University of Science and Technology, Daejeon 34113, Republic of Korea

\* Correspondence: jaeyong.lim@gmail.com (J.-Y.L.); sghong@kriss.re.kr (S.-G.H.);  
Tel.: +82-2-970-6388 (J.-Y.L.); +82-42-868-5868 (S.-G.H.)

† These authors contributed equally to this work.

**Table S1.** Material constants for the Coffin-Manson (Eq. (2)) and Basquin (Eq. (3)) models of three base metals and their welded joints. 304, 310, and 347 correspond to Super304H, TP310HCbN, and TP347H, respectively.

|         | 500 °C        |       |                       |       |              | 600 °C        |       |                       |       |              | 700 °C        |       |                       |       |              |
|---------|---------------|-------|-----------------------|-------|--------------|---------------|-------|-----------------------|-------|--------------|---------------|-------|-----------------------|-------|--------------|
|         | $\epsilon'_f$ | $c$   | $\frac{\sigma'_f}{E}$ | $b$   | $E$<br>(GPa) | $\epsilon'_f$ | $c$   | $\frac{\sigma'_f}{E}$ | $b$   | $E$<br>(GPa) | $\epsilon'_f$ | $c$   | $\frac{\sigma'_f}{E}$ | $b$   | $E$<br>(GPa) |
| 304, BM | 0.083         | 0.396 | $4.68 \times 10^{-3}$ | 0.094 | 165.5        | 0.047         | 0.337 | $3.31 \times 10^{-3}$ | 0.056 | 155.4        | 0.044         | 0.351 | $3.36 \times 10^{-3}$ | 0.059 | 141.0        |
| 304, WJ | 0.837         | 0.752 | $6.87 \times 10^{-3}$ | 0.143 | 146.0        | 0.403         | 0.670 | $6.55 \times 10^{-3}$ | 0.134 | 139.7        | 0.205         | 0.640 | $4.17 \times 10^{-3}$ | 0.099 | 138.2        |
| 310, BM | 0.706         | 0.611 | $8.12 \times 10^{-3}$ | 0.144 | 160.0        | 0.944         | 0.677 | $9.71 \times 10^{-3}$ | 0.170 | 160.0        | 0.703         | 0.716 | $8.98 \times 10^{-3}$ | 0.163 | 150.0        |
| 310, WJ | 0.369         | 0.583 | $8.33 \times 10^{-3}$ | 0.167 | 166.7        | 0.192         | 0.546 | $6.27 \times 10^{-3}$ | 0.132 | 161.3        | 0.563         | 0.725 | $5.37 \times 10^{-3}$ | 0.133 | 150.9        |
| 347, BM | 0.176         | 0.482 | $8.31 \times 10^{-3}$ | 0.160 | 162.0        | 0.262         | 0.565 | $4.71 \times 10^{-3}$ | 0.102 | 160.0        | 0.472         | 0.674 | $3.79 \times 10^{-3}$ | 0.088 | 155.0        |
| 347, WJ | 0.319         | 0.592 | $4.34 \times 10^{-3}$ | 0.113 | 158.1        | 0.239         | 0.612 | $5.14 \times 10^{-3}$ | 0.138 | 151.5        | 0.433         | 0.732 | $4.14 \times 10^{-3}$ | 0.113 | 150.1        |

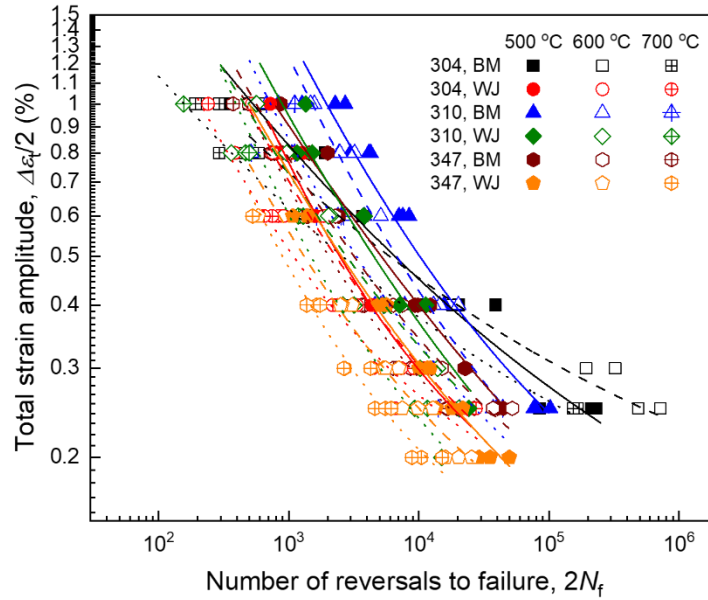

**Table S2.** Material constants for the proposed unified energy-based model, Eq. (9), developed using the strain-based approach, for three base metals and their welded joints.

|               | 500 °C |      |      | 600 °C |      |      | 700 °C |      |      |
|---------------|--------|------|------|--------|------|------|--------|------|------|
|               | $W_0$  | $m$  | $C$  | $W_0$  | $m$  | $C$  | $W_0$  | $m$  | $C$  |
| Super304H, BM | 238    | 0.49 | 0.62 | 96     | 0.39 | 0.73 | 80     | 0.41 | 0.73 |
| Super304H, WJ | 2994   | 0.88 | 0.71 | 1270   | 0.79 | 0.71 | 446    | 0.73 | 0.75 |
| TP310HCbN, BM | 2451   | 0.71 | 0.71 | 4746   | 0.83 | 0.64 | 2732   | 0.83 | 0.73 |
| TP310HCbN, WJ | 1433   | 0.71 | 0.63 | 532    | 0.64 | 0.71 | 1414   | 0.83 | 0.75 |
| TP347H, BM    | 613    | 0.61 | 0.59 | 705    | 0.66 | 0.71 | 1031   | 0.75 | 0.80 |
| TP347H, WJ    | 829    | 0.70 | 0.69 | 567    | 0.72 | 0.71 | 960    | 0.84 | 0.75 |

**Table S3.** Material constants for the proposed unified energy-based model, Eq. (12), developed using the stress-based approach, for three base metals and their welded joints.

|               | 500 °C |      |      | 600 °C |      |      | 700 °C |      |      |
|---------------|--------|------|------|--------|------|------|--------|------|------|
|               | $W_o$  | $m$  | $C$  | $W_o$  | $m$  | $C$  | $W_o$  | $m$  | $C$  |
| Super304H, BM | 353    | 0.49 | 0.62 | 97     | 0.42 | 0.73 | 102    | 0.43 | 0.73 |
| Super304H, WJ | 6521   | 0.97 | 0.71 | 3511   | 0.91 | 0.71 | 707    | 0.80 | 0.75 |
| TP310HCbN, BM | 41213  | 1.01 | 0.71 | 15273  | 0.93 | 0.64 | 31211  | 1.22 | 0.73 |
| TP310HCbN, WJ | 10101  | 0.91 | 0.63 | 6927   | 0.90 | 0.71 | 11212  | 1.08 | 0.75 |
| TP347H, BM    | 5185   | 0.78 | 0.59 | 1495   | 0.69 | 0.71 | 2123   | 0.87 | 0.80 |
| TP347H, WJ    | 1180   | 0.74 | 0.69 | 3613   | 0.94 | 0.71 | 2361   | 0.89 | 0.75 |

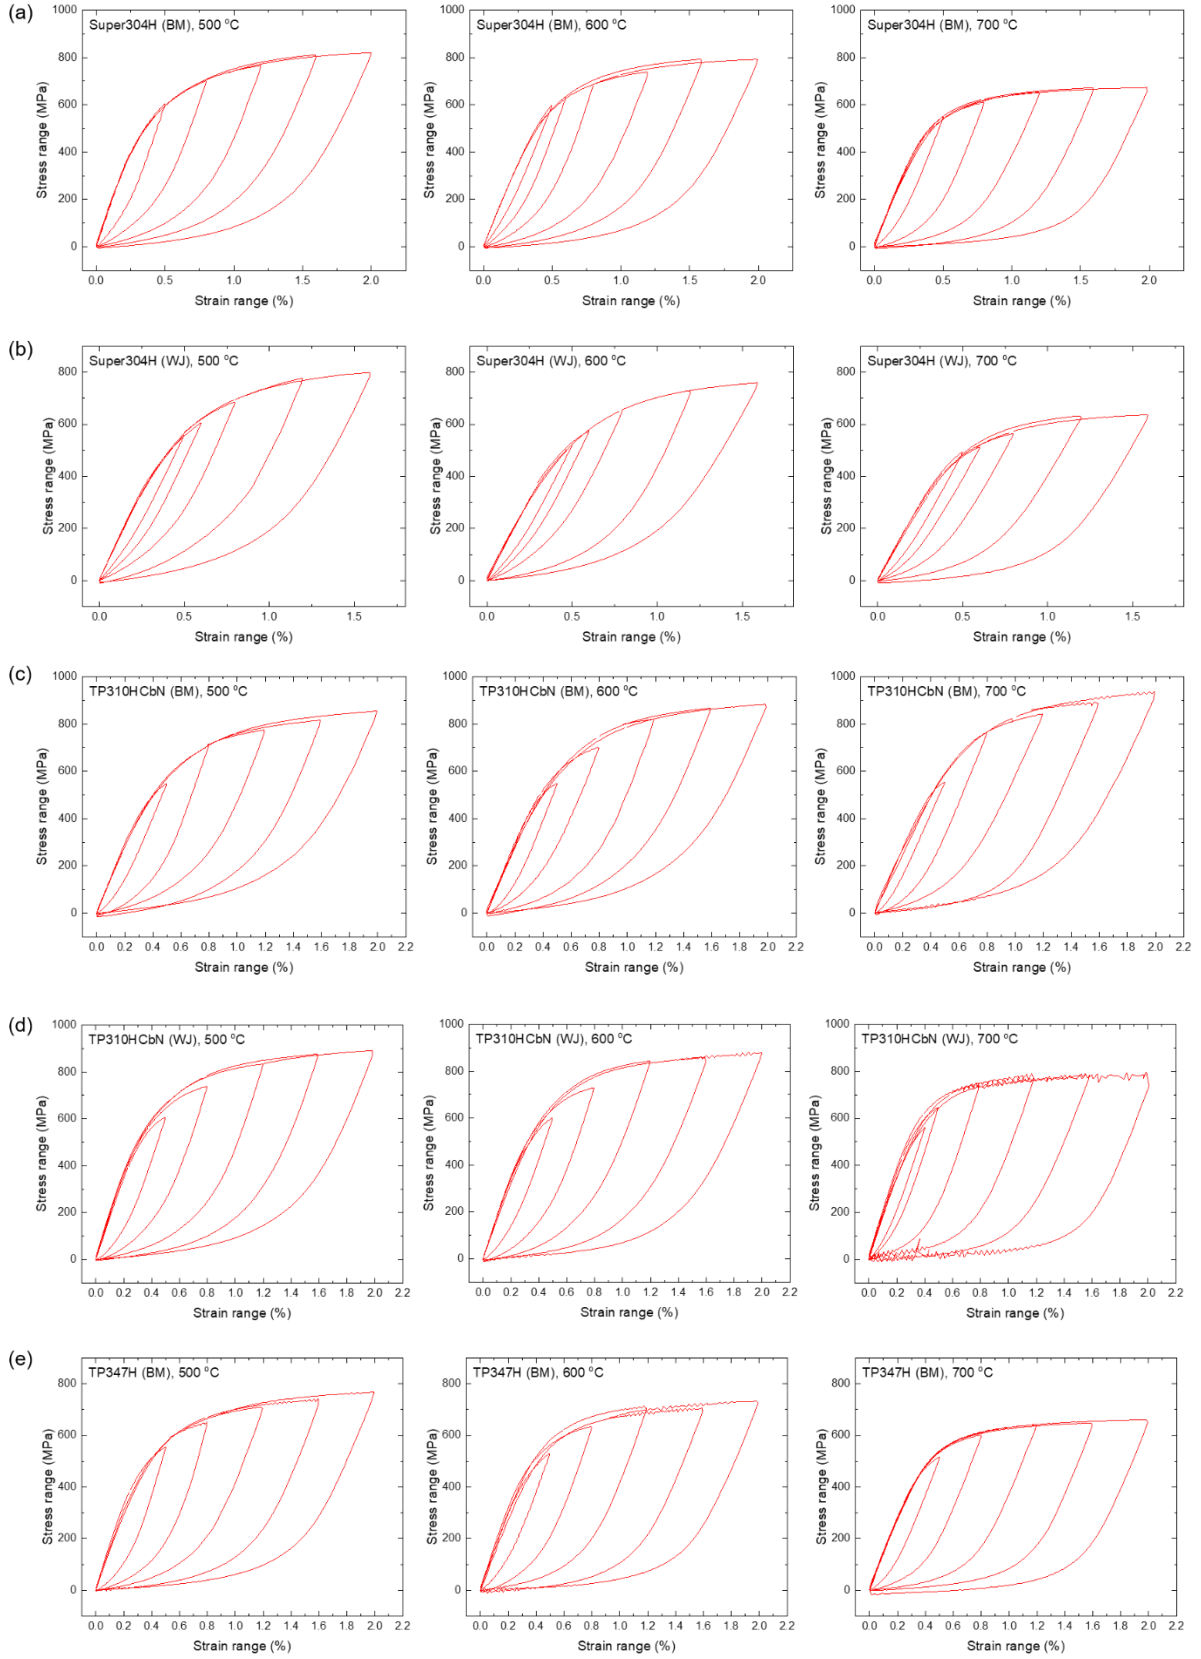

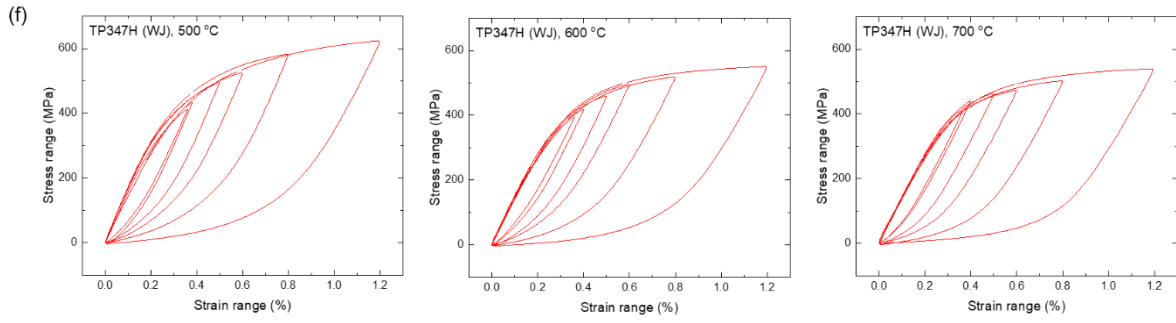

**Figure S1.** Masing behavior of stabilized stress–strain hysteresis loops at half-life for three base metals and their welded joints at temperatures of 500, 600, and 700 °C. (a) Super304H base metal, (b) Super304H welded joint, (c) TP310HCbN base metal, (d) TP310HCbN welded joint, (e) TP347H base metal, and (f) TP347H welded joint.
